# Supplementary material for: Expression Pattern of iNOS, BCL-2 and MMP-9 in the Hip Synovium Tissue of Patients with Osteoarthritis
Source: PubMed Central journal article supplement (PMC7867378; doi:10.3390/ijms22031489), 2021-02-02
Supplement: ijms-22-01489-s001.pdf [file ijms-22-01489-s001.pdf]

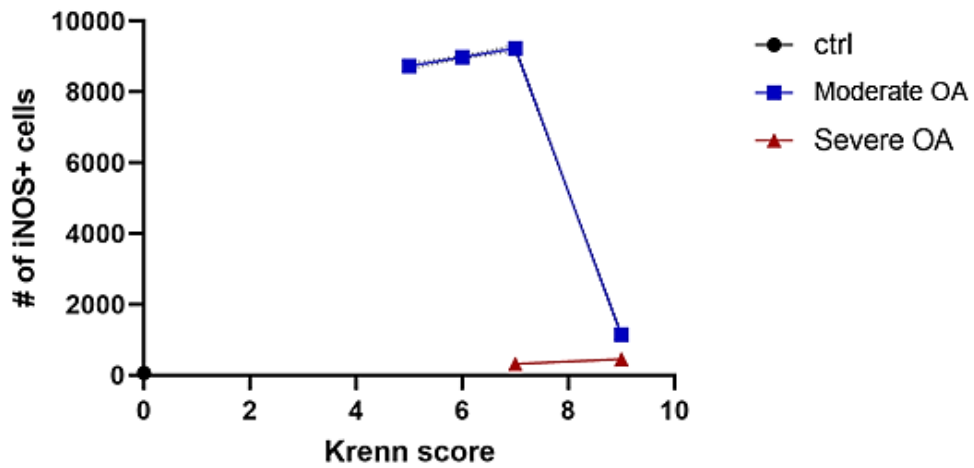

**Figure S1.** Relationship between Krenn score and iNOS expression in subintima of OA patients. Patients with moderate OA demonstrate a bi-segmental linear relationship between iNOS expression and Krenn score ( $\beta= 7464$ , 95% CI: 7023 to 7904,  $R^2 = 100\%$ ,  $p < 0.0001$ ). For scores up to 7 positive correlation between iNOS levels and Krenn score exists ( $\alpha_1=252.2$ , 95%CI: 179.6 to 325.4), whereas for scores greater than 7 the relationship is negative ( $\alpha_2=-4044$ , 95%CI: -4102 to -3987). Legend: control (ctrl) osteoarthritis (OA);  $\alpha_1$ , slope parameter before changepoint in bi-segmental linear model,  $\alpha_2$  slope parameter after the changepoint in bi-segmental linear model,  $\beta$ , intercept.
